# Supplementary material for: A one-pot fluorogenic cascade cyclization reaction via BF3-sensing
Source: Royal Society of Chemistry journal article supplement (doi:10.1039/d1an00298h), 2021-01-01
Supplement: d1an00298h1.pdf [file d1an00298h1.pdf]

## ***Electronic Supplementary Data***

### **A One-Pot Fluorogenic Cascade Cyclization Reaction *via* BF<sub>3</sub>-Sensing**

**Moumi Mandal, Ajit Kumar Mahapatra\* and Arik Kar\***

*Department of Chemistry, Indian Institute of Engineering Science and Technology, Shibpur,  
Howrah 711 103, India*

\*correspondence Address: Email: [akmahapatra@chem.iests.ac.in](mailto:akmahapatra@chem.iests.ac.in)  
Email: [akar@chem.iests.ac.in](mailto:akar@chem.iests.ac.in)

#### **Table of contents**

|                                                                                               |         |
|-----------------------------------------------------------------------------------------------|---------|
| 1. Indicative recently reported BF <sub>3</sub> sensor with the present work                  | S2      |
| 2. Experimental Section                                                                       | S3      |
| 3. Synthesis and characterization of ligand Probe                                             | S4      |
| 4. Synthesis and characterization of ligand Product                                           | S5      |
| 5. Solid State BF <sub>3</sub> Sensing                                                        | S6      |
| 6. Computational Methods                                                                      | S6      |
| 7. Calculation of Limit of Detection (LOD)                                                    | S6-S7   |
| 8. Determination of the Response time of probe towards the product                            | S7      |
| 9. Calculation of first order rate constant                                                   | S7-S8   |
| 10. Determination of fluorescence quantum yields                                              | S8      |
| 11. Emission spectra of probe                                                                 | S10     |
| 12. NMR spectra: <sup>1</sup> H NMR, <sup>13</sup> C NMR, <sup>1</sup> H- <sup>1</sup> H COSY | S9-S11  |
| 13. ESI-MS Spectra                                                                            | S11-S12 |
| 14. References                                                                                | S12     |

**1. Table S1.** Comparison of the recently reported BF<sub>3</sub> sensor with the current work.

| Sl. No | Probe structure                                                                     | Solvent      | Mode of sensing | LOD                           | Application                           | Reference                                                             |
|--------|-------------------------------------------------------------------------------------|--------------|-----------------|-------------------------------|---------------------------------------|-----------------------------------------------------------------------|
| 1.     | 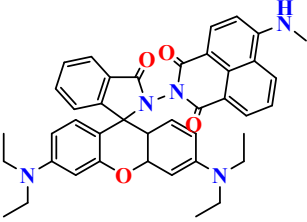   | Ethanol      | FRET            | $2.7 \times 10^{-5} \text{M}$ | TLC based test strip                  | Liu et al. <i>Sens. Actuat. B-Chem.</i> 243, <b>2017</b> , 940–945    |
| 2.     |   | Acetonitrile | ESIPT           | $8.7 \times 10^{-8} \text{M}$ | Whatma-n filter paper test strip      | Choi et al. <i>Sensors and Actuators B.</i> 17, <b>2017</b> , 30921-8 |
| 3.     |  | -            | Thin-films      | <1ppm                         | -                                     | Banet et al. <i>Sens. Actuat. B-Chem.</i> 130, <b>2008</b> , 1–8      |
| 4.     |  | Acetonitrile | Turn-On         | 13.4nM                        | Logical gate and TLC based test strip | Wang et al. <i>Sens. Actuat. B-Chem.:</i> 304, <b>2020</b> , 127-083  |
|        |  | Acetonitrile | Ratiometric     | 68.5nM                        | Logical gate and TLC based test strip |                                                                       |

|    |                                                                                   |              |                 |                                 |                      |                                                                               |
|----|-----------------------------------------------------------------------------------|--------------|-----------------|---------------------------------|----------------------|-------------------------------------------------------------------------------|
| 5. | 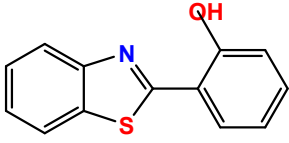 | Acetonitrile | ESIPT           | $8.7 \times 10^{-8} \text{M}$   | TLC based test strip | Chang et.al<br><i>Sens. Actuat. B-Chem.:</i><br>251, <b>2017</b> ,<br>713–719 |
| 6. |  | Acetonitrile | Ring Opening    | $1.4 \times 10^{-9} \text{M}$   | TLC based test strip | Liu et al. <i>Al Sens. Actuat. B-Chem.:</i><br>276, <b>2018</b> ,<br>166–172  |
| 7. |  | Acetonitrile | Chemod osimeter | $6.36 \times 10^{-10} \text{M}$ | TLC based test strip | Our work                                                                      |

## 2. Experimental Section

### 2.1. Materials and Instrumentation

All solvents were dried by distillation prior to use whereas commercial reagents (**1**, phenylacetylene,  $\text{BF}_3 \cdot \text{Et}_2\text{O}$ ) were used without any further purification.  $^1\text{H}$  and  $^{13}\text{C}$  NMR spectra were recorded on a Jeol (500 MHz) spectrometer using a deuterated solvent as the lock and residual protiated solvent as internal reference ( $\text{CDCl}_3$ :  $\delta_{\text{H}}$  7.26 ppm,  $\delta_{\text{C}}$  77.0 ppm). The following abbreviations were used to define NMR peak patterns: s = singlet, d = doublet, t = triplet, dd = doublet of doublets, ddd = doublet of doublets of doublets, td = triplet of doublets, br = broad, m = multiplet. The coupling constants are given in Hertz (Hz) and, wherever possible, assignment of protons is made. The carbons in the molecular skeletons were not necessarily numbered following the IUPAC nomenclature rules; numeration was exclusively done for assigning NMR signals. All electrospray ionization (ESI-MS) spectra were recorded on a Thermo-Quest LCQ deca and the theoretical isotopic distributions of the mass signals were calculated using IsoPro 3.0 software. Melting points of compounds were measured on a BÜCHI 510 instrument and are not corrected. Infrared spectra were recorded on a Varian 1000 FT-IR instrument. Elemental analysis was performed using the EA-3000 CHNS analyzer. UV-vis spectra were recorded on Cary Win 50 (298 K) spectrometer. Column chromatography was performed either on silica gel (60-400 mesh) or neutral alumina (Fluka, 0.05-0.15 mm,

Brockmann Activity 1). Merck silica gel (60 F254) or neutral alumina (150 F254) sheets were used for thin layer chromatography (TLC). Compounds **2**<sup>1</sup> and **3**<sup>2</sup> were synthesized according to literature known procedures.

## 2.2. General Method of UV-vis and Fluorescence Titrations

For UV-visible and fluorescence titration, a stock solution of the chemosensor **4** ( $1 \times 10^{-5}$  M) and the stock solution of the analyte,  $\text{BF}_3 \cdot \text{OEt}_2$  ( $1 \times 10^{-4}$  M) were prepared in acetonitrile solution. Same concentration will be pursued for other intrusive ordinary Lewis acids. Titrations were executed by filling 2 ml of the probe solution in a quartz cell having 1 cm optical path length.

## 3. Synthesis and characterization of Probe

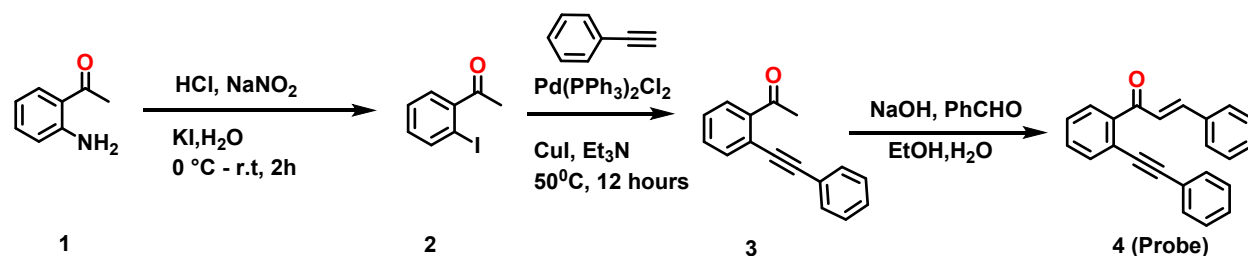

Scheme S1. Synthetic scheme for the preparation of Probe 4

**[(E)-3-phenyl-1-(2-(phenylethynyl) phenyl) prop-2-en-1-one] (4)**

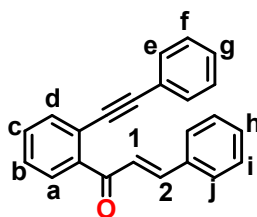

To a solution of compound **3** (220 mg, 1.0 mmol) and Benzaldehyde (106 mg, 1.0 mmol) in Methanol (50 mL) was added 5 mL solution of NaOH (1 M in  $\text{H}_2\text{O}$ ) at  $0\text{ }^\circ\text{C}$ . After stirring for 1 h at this temperature it was subjected to stir at room temperature for 2 h. After the starting materials had been consumed, the mixture was extracted with ethyl acetate, washed with brine

and dried over anhydrous  $\text{Na}_2\text{SO}_4$ . The solvent was evaporated, and the residue was purified by column chromatography (silica gel, EtOAc/Hexane = 1:7) to afford 210 mg (680  $\mu\text{mol}$ , 68%) of the desired product **4** as yellow oil. **IR (KBr):**  $\tilde{\nu}$  = 755, 811, 852, 915, 963, 997, 1031, 1069, 1096, 1159, 1185, 1278, 1310, 1383, 1442, 1491, 1570, 1599, 1623, 1697, 1954, 2216, 3058, 3200  $\text{cm}^{-1}$ .  **$^1\text{H}$  NMR (500 MHz,  $\text{CDCl}_3$ , **298K**):**  $\delta$  = 7.18-7.23 (m, 1H, i-H), 7.26-7.27 (m, 1H, h-H), 7.34-7.39 (m, 4H, f, g-H), 7.44 (ddd,  $^3J$  = 7.8 Hz,  $^4J$  = 1.0 Hz, 1H, c-H), 7.50 (ddd,  $^3J$  = 7.8 Hz,  $^3J$  = 3.2 Hz,  $^4J$  = 1.0 Hz, 1H, b-H), 7.57 (d,  $^3J$  = 15.8 Hz, 1H, 2-H), 7.58-7.62 (m, 2H, e, j-H), 7.65 (ddd,  $^3J$  = 7.8 Hz,  $^4J$  = 1.2 Hz,  $^5J$  = 0.2 Hz, 1H, b-H), 7.69 (ddd,  $^3J$  = 7.8 Hz,  $^4J$  = 1.2 Hz,  $^5J$  = 0.2 Hz, 1H, a-H), 7.70 (d,  $^3J$  = 15.8 Hz, 1H, 1-H) ppm.  **$^{13}\text{C}$  NMR (125 MHz,  $\text{CDCl}_3$ , **298K**):**  $\delta$  = 87.9, 95.4, 121.6, 122.6, 128.2, 128.3, 128.5, 128.6, 128.7, 128.8, 128.9, 130.5, 130.8, 131.5, 133.1, 134.9, 141.9, 144.4, 193.7 ppm. **ESI-MS: m/z (%)** = 309.4 (100) [**4**+H] $^+$ ; **Elemental analysis: Calcd. for  $\text{C}_{23}\text{H}_{16}\text{O}$ :** C, 89.58; H, 5.23; **Found:** C, 89.39; H, 5.12;

#### 4. Synthesis and characterization of Product

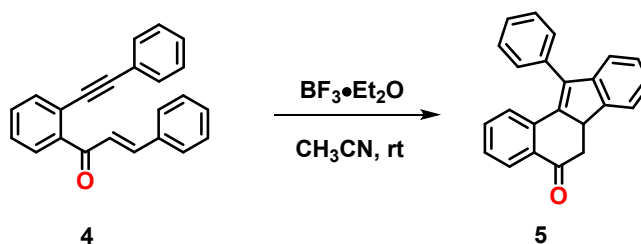

**Scheme S2.** Synthetic scheme for the preparation of compound **5**

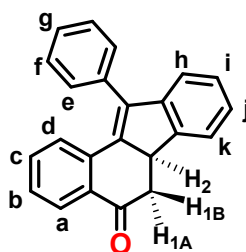

Compound **4** (100 mg, 324  $\mu\text{mol}$ ) was loaded into an oven-dried 100 mL round bottom flask and charged with  $\text{BF}_3 \cdot \text{Et}_2\text{O}$  (3.95  $\mu\text{L}$ , 3.24  $\mu\text{mol}$ ) at room temperature and subjected to stir for 30 min. After completion of reaction (monitored by TLC), the mixture was extracted with ethyl acetate, washed with brine and dried over anhydrous  $\text{Na}_2\text{SO}_4$ . The solvent was evaporated, and the residue was purified by column chromatography (silica gel, EtOAc/Hexane = 1:3) to afford 84 mg (275  $\mu\text{mol}$ , 85%) of the desired product **5** as reddish solid. **IR (KBr):**  $\tilde{\nu}$  = 662, 678, 737,

790, 852, 881, 980, 1030, 1141, 1167, 1380, 1422, 1440, 1490, 1510, 1535, 1566, 1604, 1789 2161, 2911  $\text{cm}^{-1}$ ;  **$^1\text{H}$  NMR (500 MHz,  $\text{CDCl}_3$ , 298K):**  $\delta$  = 2.50 (dd,  $^3J$  = 16 Hz,  $^3J$  = 14 Hz, 1H, 2-H), 3.52 (dd,  $^4J$  = 16.0 Hz,  $^3J$  = 5.5 Hz, 1H, 1<sub>A</sub>-H), 4.17 (dd,  $^4J$  = 16.0 Hz,  $^3J$  = 5.5 Hz, 1H, 1<sub>B</sub>-H), 7.16-7.19 (m, 1H, d-H), 7.23-7.26 (m, 1H, c-H), 7.28-7.32 (m, 1H, [e, i, k, b -H]), 7.41-7.53 (m, 1H, [f, g, h, i] -H) ppm.  **$^{13}\text{C}$  NMR (125 MHz,  $\text{CDCl}_3$ , 298K):**  $\delta$  = 42.9, 48.9, 121.4, 122.8, 126.0, 127.5, 127.7, 127.8, 128.0, 128.9, 129.0, 130.9, 133.3, 134.7, 137.2, 138.0, 139.5, 145.8, 146.4 ppm. **ESI-MS:**  $m/z$  (%) = 309.1 (100) [**5**+H]<sup>+</sup>; **Elemental analysis:** Calcd. for  $\text{C}_{23}\text{H}_{16}\text{O}$ : C, 89.58; H, 5.23; Found: C, 89.62; H, 5.20.

## 5. Solid State $\text{BF}_3$ Sensing

A small piece of TLC sticks is supposed to be a solid-state platform for the detection of  $\text{BF}_3$ . The TLC strips were dipped into the probe solution ( $1 \times 10^{-5}$  M) followed by drying in air. Different concentrations of  $\text{BF}_3$  solutions (10, 20, 30, 40, 50 and 60  $\mu\text{L}$ ) were prepared in acetonitrile solution in a glass screw top container. The probe coated TLC strips were exposed in various concentrations of  $\text{BF}_3$  solution for 5 minutes. After 5 minutes. photographs will be taken to scrutinize the sensing performance.

## 6. Computational Method

For the determination of the electronic behavior of the product, we as well executed quantum chemical DFT calculation by using the Gaussian 09 program with the assist of the Gauss View visualization program. The probe and the product were optimized by using the B3LYP/6-311G+(d, p) basis set.

**Table S2:** The vertical main orbital transition of product calculated by TDDFT method

| Energy (eV) | Wave length (nm) | Osc.strength (f) | Transition |
|-------------|------------------|------------------|------------|
| 3.3875      | 366.01           | 0.1867           | HOMO→LUMO  |

|        |        |        |             |
|--------|--------|--------|-------------|
|        |        |        |             |
| 3.5128 | 352.95 | 0.0622 | HOMO-1→LUMO |
| 4.0365 | 307.16 | 0.1706 | HOMO→LUMO+1 |

**Table S3:** The vertical main orbital transition of probe calculated by TDDFT method

| Energy (eV) | Wave length (nm) | Osc.strength (f) | Transition   |
|-------------|------------------|------------------|--------------|
| 3.1385      | 395.04           | 0.0005           | HOMO-2 →LUMO |
| 3.2178      | 385.31           | 0.0800           | HOMO→LUMO    |
| 3.7849      | 327.57           | 0.1861           | HOMO-1 →LUMO |

## 7. Calculation of Limit of Detection (LOD)

The detection limit is obtained from a plot of fluorescence intensity at 449 nm vs function of BF<sub>3</sub> concentration. The S/N ration is determined by the 10 times measurable emission intensity of the probe without the addition of BF<sub>3</sub>. Afterward the standard deviation of blank measurements is calculated. The LOD value of probe for BF<sub>3</sub> was determined by the following equation:

$$\text{LOD} = K \times \delta / m \quad (1)$$

Where K= 2 or 3

( $\delta$  is the standard deviation of the blank solution and m is the slope the calibration curve.

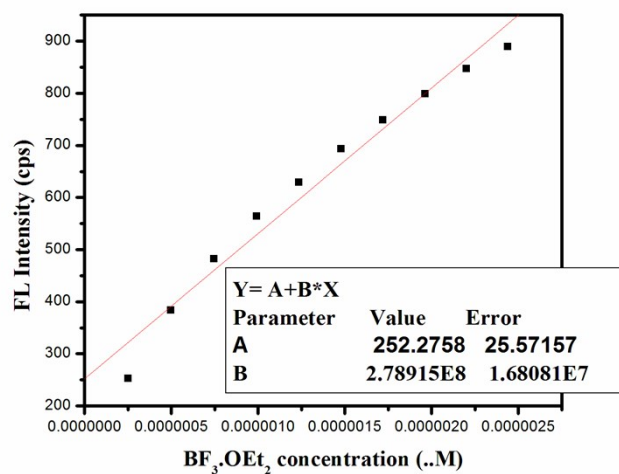

**Figure S1.** Calibration curve of the probe at 449 nm depending on  $\text{BF}_3$  concentration

So,  $\text{LOD} = 6.36 \times 10^{-10}$  (M) ( $R^2 = 0.98578$ ).

### 8. Determination of the response time of probe towards the product

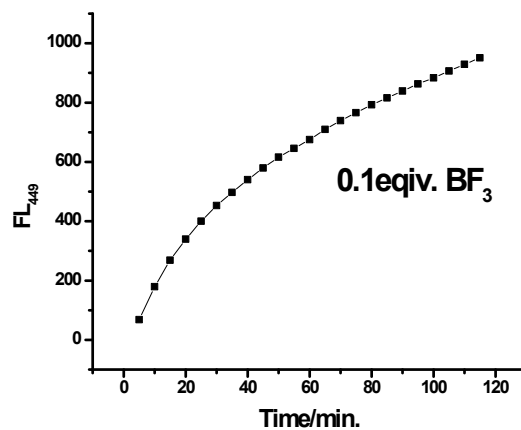

**Figure S2.** Time periods (0–130 mins) of fluorescence enhancement of probe ( $1 \times 10^{-5}$  M) in acetonitrile solution upon addition of 0.1 equivalent of  $\text{BF}_3$  ( $\lambda_{\text{ex}} = 370$  nm;  $\lambda_{\text{em}} = 449$  nm).

### 9. Calculation of first order rate constant ( $k'$ )

First order rate constant was calculated by the following equation:

$$\ln[(F_{\text{max}} - F_t) / F_{\text{max}}] = -k't \quad (2)$$



Where,  $F_t$  and  $F_{\max}$  symbolize the fluorescence intensities at 449 nm at time  $t$  and maximum value acquired upon the completion of the reaction and  $k'$  is the monitored first order rate constant.

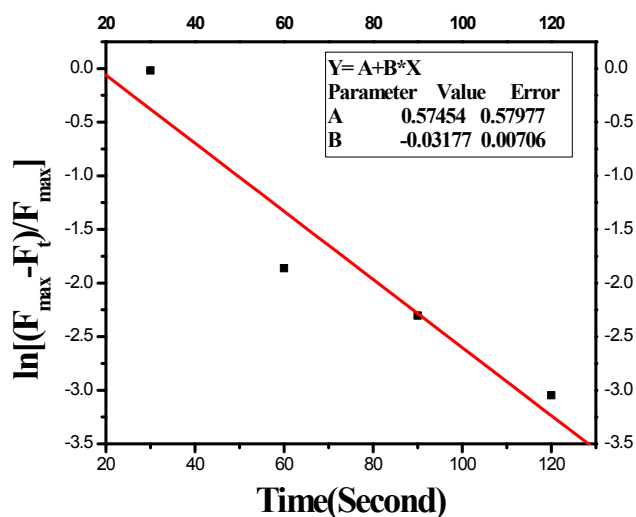

**Figure S3.** First order kinetic plot of probe ( $1 \times 10^{-5}$  M) in the presence of 5 equivalent of  $1 \times 10^{-4}$  (M)  $\text{BF}_3$  solution ( $\lambda_{\text{ex}} = 370$  nm,  $\lambda_{\text{em}} = 449$  nm).

First order rate constant  $k' = 0.031 \text{ s}^{-1}$ .

## 10. Determination of fluorescence quantum yield of 5.

The fluorescence quantum yield is calculated by the following equation:

$$\varphi_S = \varphi_A \times \frac{F_A}{F_S} \times \frac{A_A}{A_S} \times \frac{\eta_A^2}{\eta_S^2} \quad (3)$$

Where  $F_A$  and  $F_S$  are the integrated fluorescence intensity of **5** and Anthracene (reference) respectively.

$A_A$  and  $A_S$  are the absorbance of the **5** and Anthracene (reference) respectively at same excitation wavelength.

$\eta_A$  and  $\eta_S$  are the refractive indices of respective solvents employed as Acetonitrile and Ethanol.

So, quantum yeild = 0.27 (27%)

## 11. Emission spectra of probe

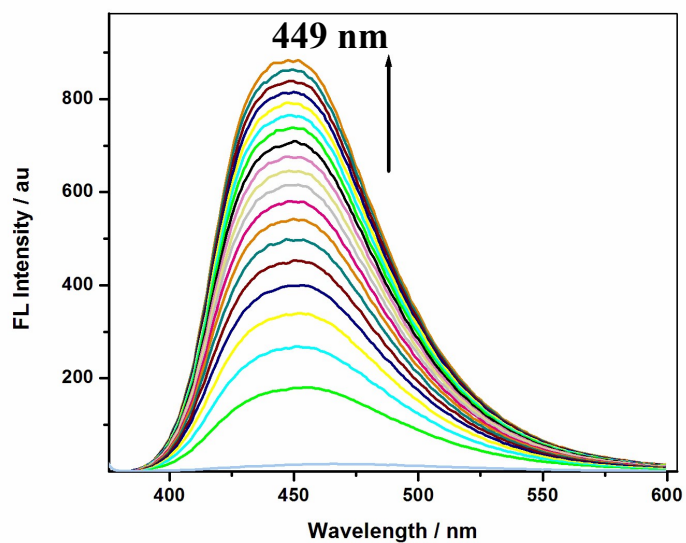

**Figure S4:** Emission spectra of probe ( $1 \times 10^{-5}$  M) upon steady addition of  $\text{BF}_3 \cdot \text{OEt}_2$  (0 to 50  $\mu\text{M}$ ): ( $\lambda_{\text{ex}} = 326$  nm,  $\lambda_{\text{em}} = 449$  nm).

## 12. NMR spectra: $^1\text{H}$ NMR, $^1\text{H}$ - $^1\text{H}$ COSY, $^{13}\text{C}$ NMR,

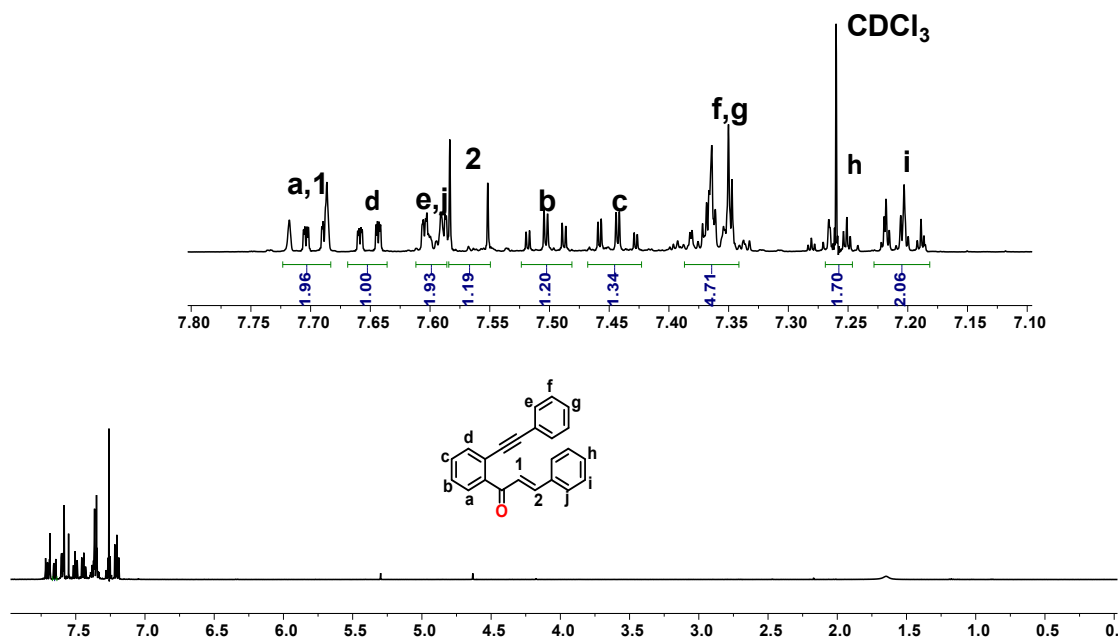

Figure S5.  $^1\text{H}$  NMR spectrum of **4** in  $\text{CDCl}_3$  (500 MHz, 298 K).

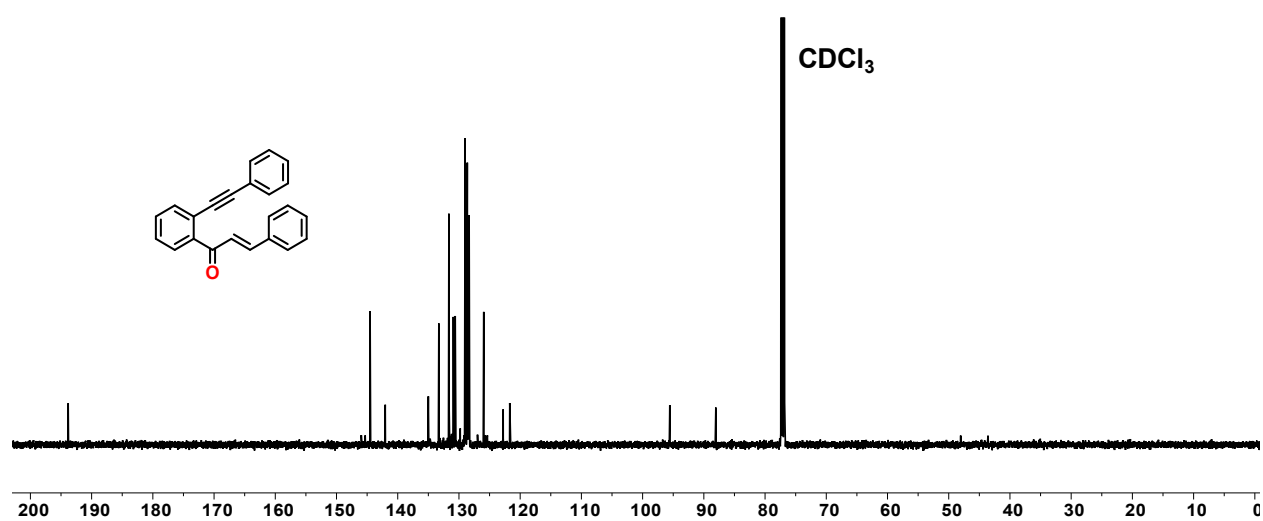

Figure S6.  $^{13}\text{C}$  NMR spectrum of **4** in  $\text{CDCl}_3$  (500 MHz, 298 K).

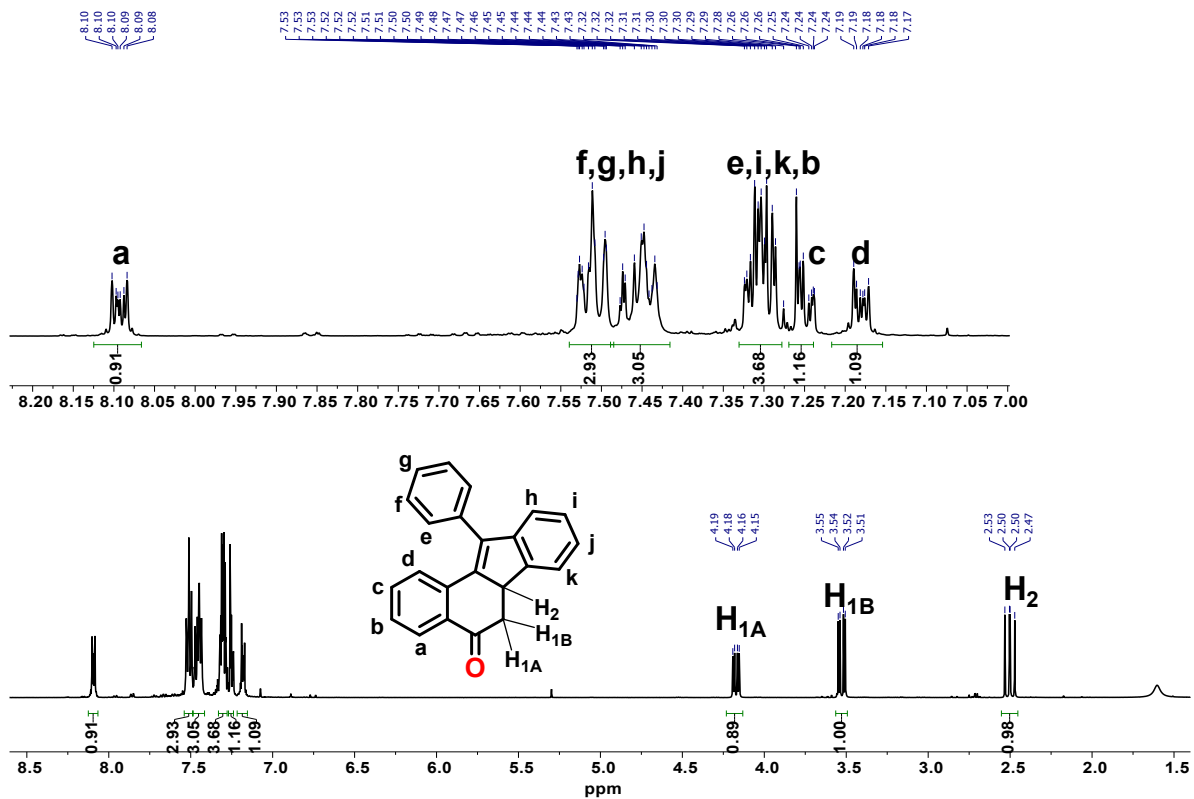

Figure S7.  $^1\text{H}$  NMR spectrum of **5** in  $\text{CDCl}_3$  (500 MHz, 298 K).

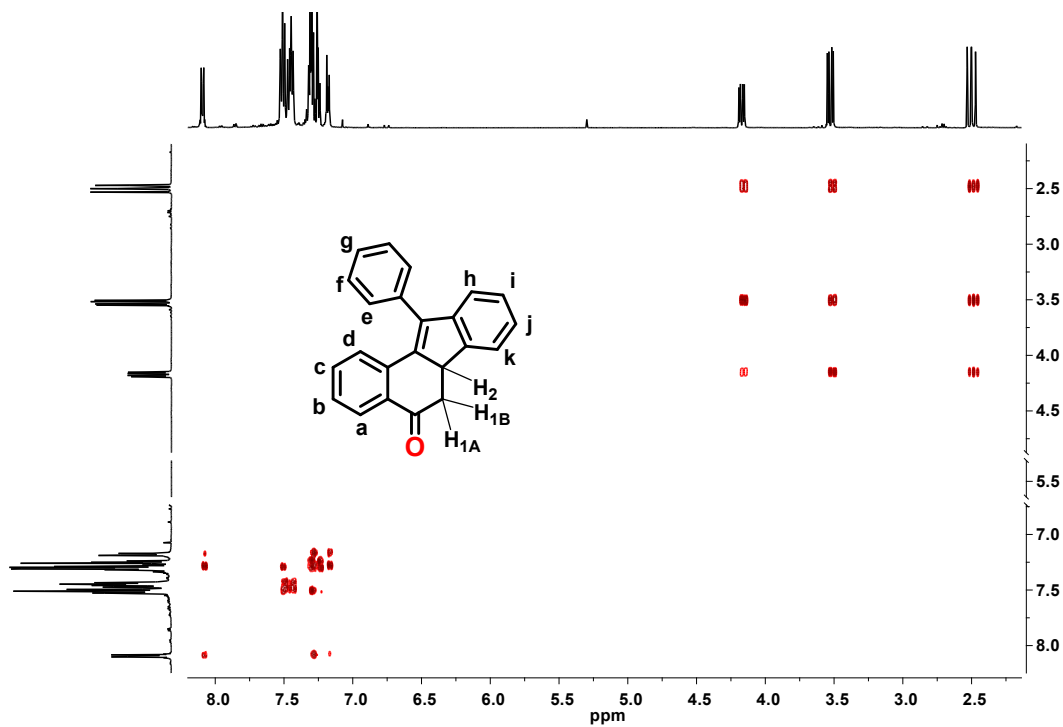

Figure S8.  $^1\text{H}$ - $^1\text{H}$  COSY NMR spectrum of **5** in  $\text{CDCl}_3$  (500 MHz, 298 K).

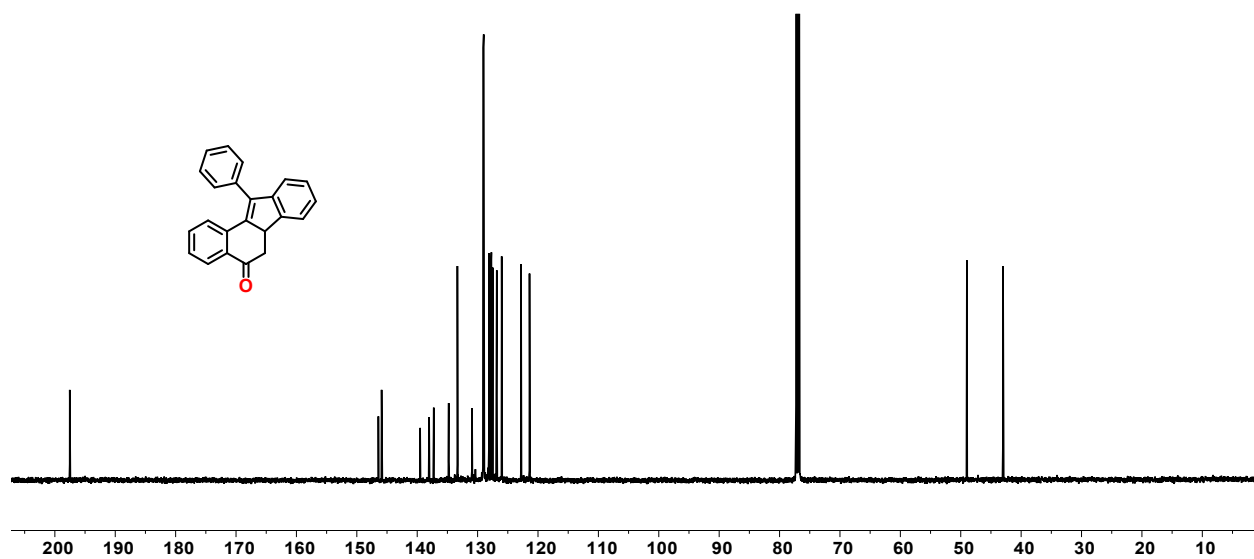

Figure S9.  $^{13}\text{C}$  COSY NMR spectrum of **5** in  $\text{CDCl}_3$  (500 MHz, 298 K).

### 13. ESI-MS Spectra

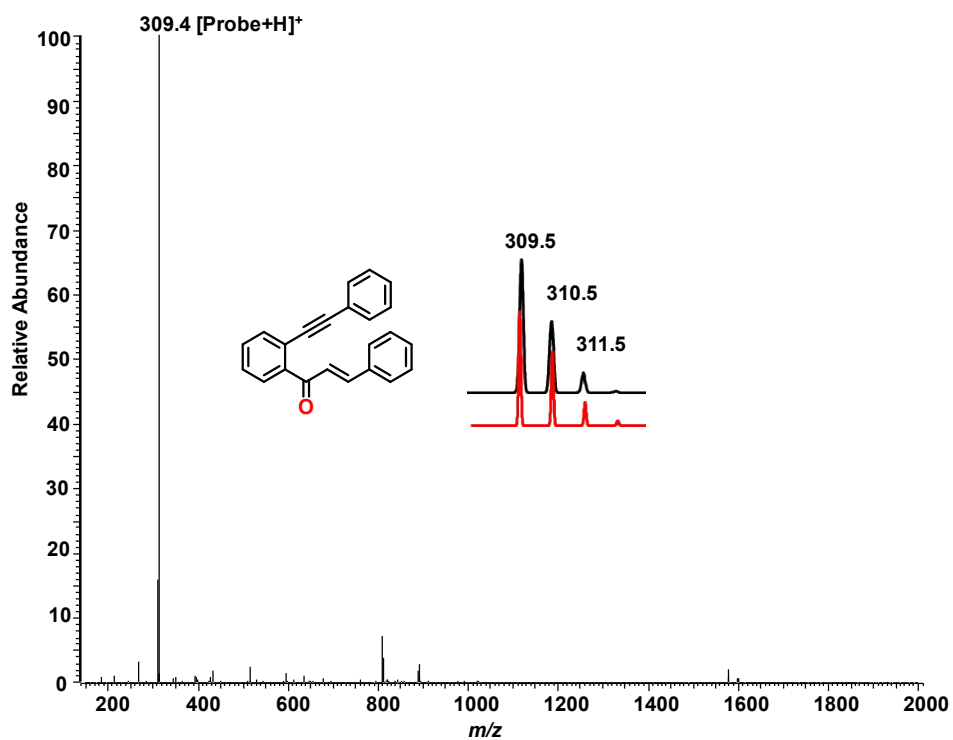

Figure S10. ESI-MS of **4** after protonation.

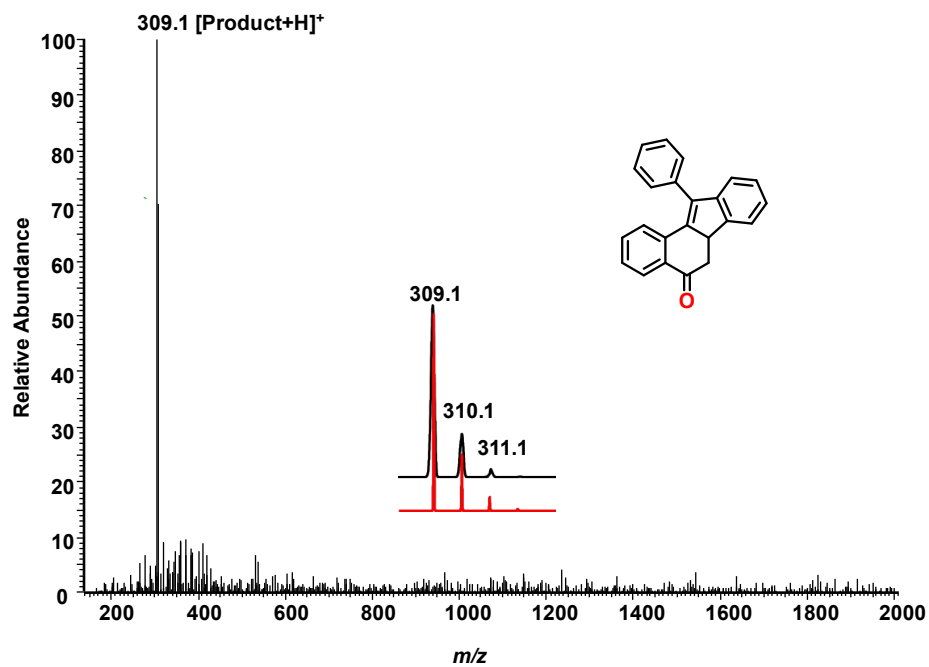

Figure S11. ESI-MS of **5** after protonation.

#### References:

1. Q. Li, J. Liu, Y. Wei, and M. Shi, *J. Org. Chem.*, 2020, **85**, 2438-2455
2. L. Zheng, B. Zhou, Hongwei Jin, T. Li, and Y. Liu, *Org. Lett.*, 2018, **20**, 7053-7056
